# Supplementary material for: Methylated Septin 9 and Carcinoembryonic Antigen for Serological Diagnosis and Monitoring of Patients with Colorectal Cancer After Surgery
Source: PubMed Central journal article supplement (PMC6637112; doi:10.1038/s41598-019-46876-4), 2019-07-17
Supplement: 41598_2019_46876_MOESM1_ESM.pdf [file 41598_2019_46876_MOESM1_ESM.pdf]

# **METHYLATED SEPTIN 9 AND CARCINOEMBRYONIC ANTIGEN FOR SEROLOGICAL DIAGNOSIS AND MONITORING OF PATIENTS WITH COLORECTAL CANCER AFTER SURGERY**

Zhi Yao Ma<sup>1</sup>, Wai Lun Law<sup>2</sup>, Enders Kai On Ng<sup>3</sup>, Cherry Sze Yan Chan<sup>1</sup>, Kam Shing Lau<sup>1</sup>, Yuen Yee Cheng<sup>4</sup>, Vivian Yvonne Shin<sup>2</sup>, Ava Kwong<sup>2</sup>, Wai K. Leung<sup>1</sup>

<sup>1</sup>Department of Medicine, University of Hong Kong, Queen Mary Hospital, Hong Kong

<sup>2</sup>Department of Surgery, University of Hong Kong, Queen Mary Hospital, Hong Kong

<sup>3</sup>DiagCor Bioscience, Kowloon Bay, Hong Kong

<sup>4</sup>Asbestos Diseases Research Institute, Sydney Medical School, The University of Sydney

**Supplementary Table S1. CT values of 61 colorectal cancer patients at different time points before and after surgery**

| N o. # | Rec urrence | New Metas tases | Death | Poor Progn osis * | Pre-operation |           |              |        |              |        |                                          | Follow-up Time point 1  |              |        |              |        |              |        | Follow-up Time point 2                |                         |              |        |              |        |               |        |                                       |
|--------|-------------|-----------------|-------|-------------------|---------------|-----------|--------------|--------|--------------|--------|------------------------------------------|-------------------------|--------------|--------|--------------|--------|--------------|--------|---------------------------------------|-------------------------|--------------|--------|--------------|--------|---------------|--------|---------------------------------------|
|        |             |                 |       |                   | CT Value 1st  |           | CT Value 2nd |        | CT Value 3rd |        | Mean Value of SEPT9 Methylation Level ** | Mont hs Post-operat ion | CT Value 1st |        | CT Value 2nd |        | CT Value 3rd |        | Mean Value of SEPT9 Methylation Level | Mont hs Post-operat ion | CT Value 1st |        | CT Value 2nd |        | CT Value 3rd  |        | Mean Value of SEPT9 Methylation Level |
|        |             |                 |       |                   | Actin ##      | SEPT 9 ## | Actin        | SEPT 9 | Actin        | SEPT 9 |                                          |                         | Actin        | SEPT 9 | Actin        | SEPT 9 | Actin        | SEPT 9 |                                       |                         | Actin        | SEPT 9 | Actin        | SEPT 9 | Actin         | SEPT 9 |                                       |
| 1      | No          | Yes             | No    | Yes               | 26.16         | 37.2      | 26.16        | 45 ##  | 25.88        | 34.93  | 0.009                                    | 3M                      | 24.63        | 45     | 24.8         | 40.45  | 24.88        | 45     | 0.000                                 | 18M                     | 25.05        | 32.46  | 24.96        | 31.83  | 25.17         | 32.21  | 0.091                                 |
| 2      | No          | No              | No    | No                | 26.51         | 45        | 26.57        | 36.55  | 27.03        | 45     | 0.004                                    | 3M                      | 26.84        | 37.08  | 26.61        | 45     | 26.57        | 45     | 0.004                                 | 24M                     | 28.26        | 45     | 28.31        | 37.08  | 28.47         | 45     | 0.009                                 |
| 3      | Yes         | No              | No    | Yes               | 25.8          | 45        | 25.66        | 36.65  | 25.71        | 45     | 0.002                                    | 6M                      | 26.73        | 45     | 26.49        | 35.83  | 26.91        | 45     | 0.006                                 | 18M                     | 26.02        | 40.44  | 26.17        | 45     | 26.23         | 45     | 0.000                                 |
| 4      | No          | No              | No    | No                | 30.36         | 45        | 29.89        | 45     | 29.52        | 45     | 0.000                                    | 6M                      | 27.79        | 45     | 27.53        | 45     | 27.32        | 45     | 0.000                                 | 12M                     | 26.5         | 45     | 27.02        | 45     | 27.19         | 45     | 0.000                                 |
| 5      | No          | No              | No    | No                | 30.65         | 45        | 30.21        | 45     | 30.36        | 45     | 0.001                                    | 6M                      | 26.42        | 45     | 26.23        | 45     | 26.3         | 45     | 0.000                                 | 12M                     | 27.28        | 45     | 26.81        | 45     | 26.85         | 45     | 0.000                                 |
| 6      | No          | No              | No    | No                | 28.38         | 45        | 28.51        | 45     | 28.41        | 36.96  | 0.009                                    | 6M                      | 27.95        | 45     | 27.99        | 45     | 28.16        | 45     | 0.000                                 | 12M                     | 27.11        | 45     | 27.16        | 45     | 27.15         | 45     | 0.000                                 |
| 7      | No          | No              | No    | No                | 29.01         | 45        | 29.07        | 45     | 28.68        | 35.9   | 0.022                                    | 3M                      | 27.37        | 45     | 27.38        | 45     | 27.4         | 45     | 0.000                                 | 24M                     | 27.27        | 45     | 27.24        | 45     | 27.22         | 45     | 0.000                                 |
| 8      | Yes         | Yes             | Yes   | Yes               | 27.73         | 34.51     | 27.12        | 34.73  | 27.55        | 35.12  | 0.086                                    | 6M                      | 32.19        | 45     | 32.18        | 45     | 32.12        | 45     | 0.002                                 | 15M                     | 23.35        | 24.33  | 23.52        | 24.46  | 23.44         | 24.37  | 6.547                                 |
| 9      | No          | No              | No    | No                | 26.7          | 35.78     | 26.4         | 37.06  | 26.53        | 36.19  | 0.016                                    | 3M                      | 27.2         | 45     | 27.35        | 45     | 26.84        | 45     | 0.000                                 | 24M                     | 27.17        | 45     | 27.21        | 36.93  | 27.21         | 45     | 0.005                                 |
| 10     | No          | No              | No    | No                | 25.02         | 36.94     | 25.25        | 45     | 24.92        | 45     | 0.001                                    | 3M                      | 26.7         | 45     | 26.61        | 45     | 26.61        | 45     | 0.000                                 | 21M                     | 27.36        | 43.69  | 27.46        | 36.4   | 27.58         | 45     | 0.008                                 |
| 11     | No          | No              | No    | No                | 30.35         | 45        | 30.2         | 45     | 30.17        | 45     | 0.000                                    | 6M                      | 28.62        | 45     | 28.45        | 45     | 28.68        | 45     | 0.000                                 | 12M                     | 27.04        | 37.44  | 27.44        | 36.21  | Undeter mined | 45     | 0.014                                 |
| 12     | No          | No              | No    | No                | 28.93         | 45        | 28.73        | 45     | 28.85        | 45     | 0.000                                    | 6M                      | 27.29        | 45     | 27.18        | 45     | 27.33        | 45     | 0.000                                 | 12M                     | 22.7         | 45     | 22.88        | 35.88  | 22.73         | 35.63  | 0.001                                 |
| 13     | Yes         | Yes             | Yes   | Yes               | 26.91         | 33.69     | 26.58        | 33.74  | 26.66        | 33.67  | 0.102                                    | 3M                      | 27.09        | 29.6   | 27.3         | 29.74  | 27.42        | 29.76  | 2.332                                 | 6M                      | 23.05        | 23.57  | 23.53        | 23.75  | 23.79         | 24.08  | 9.899                                 |
| 14     | No          | No              | No    | No                | 27.36         | 45        | 27.39        | 37.06  | 26.89        | 45     | 0.005                                    | 6M                      | 29.06        | 39.27  | 29.18        | 45     | 29.25        | 45     | 0.004                                 | 12M                     | 27.85        | 45     | 28.02        | 45     | 28.31         | 45     | 0.000                                 |
| 15     | No          | No              | No    | No                | 25.77         | 45        | 25.34        | 35.71  | 25.55        | 35.1   | 0.007                                    | 3M                      | 28.06        | 45     | 28           | 45     | 28.53        | 45     | 0.000                                 | 15M                     | 33.82        | 45     | 32.97        | 45     | 32.76         | 45     | 0.004                                 |
| 16     | No          | Yes             | No    | Yes               | 28.09         | 35.26     | 28.31        | 45     | 28.1         | 36.92  | 0.044                                    | 6M                      | 28.89        | 38.31  | 28.63        | 45     | 28.55        | 35.48  | 0.035                                 | 24M                     | 27.45        | 45     | 27.45        | 45     | 27.06         | 45     | 0.000                                 |
| 17     | No          | Yes             | Yes   | Yes               | 28.36         | 39.2      | 27.83        | 45     | 27.98        | 45     | 0.003                                    | 3M                      | 29.7         | 41.22  | 29.43        | 45     | 30.23        | 45     | 0.002                                 | 6M                      | 27.63        | 35.43  | 27.56        | 34.31  | 27.68         | 35.53  | 0.076                                 |
| 18     | No          | No              | No    | No                | 29.58         | 45        | 29.79        | 37.19  | 29.55        | 45     | 0.024                                    | 6M                      | 26.55        | 45     | 26.26        | 45     | 26.23        | 45     | 0.000                                 | 12M                     | 27.05        | 45     | 26.77        | 45     | 26.96         | 45     | 0.000                                 |
| 19     | No          | No              | No    | No                | 29.08         | 33.07     | 28.93        | 32.53  | 29.39        | 32.71  | 1.000                                    | 6M                      | 25.61        | 45     | 25.49        | 45     | 25.45        | 44.38  | 0.000                                 | 12M                     | 26.36        | 45     | 26.42        | 45     | 26.38         | 45     | 0.000                                 |
| 20     | No          | No              | No    | No                | 30.16         | 45        | 30.69        | 36.87  | 30.88        | 45     | 0.056                                    | 6M                      | 25.8         | 45     | 25.84        | 45     | 26.39        | 37.63  | 0.001                                 | 12M                     | 26.25        | 45     | 26.82        | 45     | 26.94         | 40.87  | 0.000                                 |
| 21     | No          | No              | No    | No                | 28.56         | 45        | 28.56        | 37.02  | 28.88        | 45     | 0.011                                    | 6M                      | 26.3         | 35.98  | 26.53        | 37.75  | 26.56        | 36.32  | 0.012                                 | 15M                     | 25.41        | 45     | 25.64        | 45     | 25.49         | 37.9   | 0.001                                 |
| 22     | No          | No              | No    | No                | 26.8          | 45        | 27.04        | 45     | 27.42        | 45     | 0.000                                    | 3M                      | 24.53        | 45     | 24.36        | 37.93  | 24.27        | 45     | 0.000                                 | 18M                     | 26.9         | 45     | 26.97        | 45     | 26.95         | 45     | 0.000                                 |
| 23     | No          | No              | No    | No                | 30.02         | 45        | 29.94        | 45     | 30.11        | 45     | 0.000                                    | 6M                      | 31.11        | 45     | 32.19        | 45     | 31.8         | 45     | 0.001                                 | 15M                     | 26.65        | 45     | 26.59        | 45     | 26.43         | 45     | 0.000                                 |
| 24     | No          | No              | No    | No                | 25.71         | 33.34     | 25.55        | 33.02  | 25.67        | 33.26  | 0.067                                    | 9M                      | 27.8         | 45     | 27.54        | 45     | 27.78        | 45     | 0.000                                 | 18M                     | 28.44        | 45     | 28.51        | 45     | 28.46         | 45     | 0.000                                 |
| 25     | No          | Yes             | Yes   | Yes               | 27.79         | 45        | 27.6         | 45     | 27.65        | 45     | 0.000                                    | 3M                      | 27.07        | 45     | 27.84        | 45     | 27.99        | 45     | 0.000                                 | 15M                     | 26.23        | 36.57  | 26.34        | 35.48  | 26.38         | 45     | 0.011                                 |
| 26     | No          | No              | Yes   | Yes               | 26.6          | 45        | 26.6         | 36.51  | 27           | 36.08  | 0.011                                    | 6M                      | 27.14        | 34.4   | 27.18        | 34.29  | 27.11        | 34.82  | 0.080                                 | 9M                      | 27.26        | 33.28  | 27.6         | 32.46  | 27.22         | 33.15  | 0.276                                 |
| 27     | No          | No              | No    | No                | 25.57         | 45        | 25.71        | 45     | 25.86        | 36.98  | 0.001                                    | 12M                     | 26.08        | 45     | 26.08        | 38.01  | 25.97        | 45     | 0.001                                 | 18M                     | 26.78        | 45     | 28.17        | 45     | 27.88         | 45     | 0.000                                 |
| 28     | No          | No              | No    | No                | 26.44         | 35.66     | 26.5         | 36.23  | 26.41        | 35.28  | 0.021                                    | 1M                      | 28.27        | 45     | 28.34        | 38.28  | 28.2         | 38.31  | 0.007                                 | 24M                     | 25.3         | 45     | 25.3         | 37.92  | 25.33         | 45     | 0.001                                 |
| 29     | No          | No              | No    | No                | 28.46         | 38.27     | 28.79        | 42.09  | 28.56        | 41.93  | 0.007                                    | 12M                     | 26.9         | 45     | 27.15        | 45     | 26.79        | 45     | 0.000                                 | 21M                     | 26.26        | 45     | 26.23        | 45     | 26.17         | 45     | 0.001                                 |
| 30     | No          | No              | No    | No                | 29.93         | 45        | 30.47        | 45     | 30.13        | 45     | 0.000                                    | 6M                      | 24.89        | 36.88  | 24.75        | 45     | 24.72        | 37.2   | 0.002                                 | 21M                     | 24.49        | 37.01  | 24.51        | 45     | 24.51         | 41.65  | 0.001                                 |
| 31     | No          | Yes             | No    | Yes               | 28.55         | 41.85     | 29.28        | 37.34  | 29.16        | 43.09  | 0.016                                    | 9M                      | 26.01        | 28.34  | 26.07        | 28.44  | 26.11        | 28.34  | 2.537                                 | 21M                     | 24.83        | 36.2   | 24.97        | 36.12  | 24.87         | 37.23  | 0.004                                 |
| 32     | No          | No              | No    | No                | 30.1          | 45        | 30.24        | 36.78  | 30.43        | 45     | 0.044                                    | 6M                      | 29.44        | 45     | 29.32        | 45     | 29.39        | 45     | 0.000                                 | 12M                     | 27.5         | 45     | 27.62        | 36.96  | 27.34         | 45     | 0.006                                 |

|    |     |     |    |     |       |       |       |       |       |       |       |    |       |       |       |       |       |       |       |     |       |       |       |       |       |       |       |
|----|-----|-----|----|-----|-------|-------|-------|-------|-------|-------|-------|----|-------|-------|-------|-------|-------|-------|-------|-----|-------|-------|-------|-------|-------|-------|-------|
| 33 | No  | No  | No | No  | 26.87 | 36.24 | 27    | 36.63 | 27.48 | 36.96 | 0.018 | 3M | 26.11 | 45    | 26.06 | 37.37 | 26.05 | 45    | 0.002 | 18M | 25.67 | 45    | 25.66 | 45    | 25.88 | 45    | 0.000 |
| 34 | No  | No  | No | No  | 29.56 | 33.95 | 29.08 | 34.52 | 29.45 | 35.7  | 0.388 | 3M | 28.23 | 45    | 28.18 | 45    | 27.98 | 45    | 0.000 | 15M | 28.96 | 45    | 28.88 | 45    | 29.32 | 45    | 0.000 |
| 35 | Yes | Yes | No | Yes | 28.22 | 36.03 | 27.93 | 35.84 | 28.11 | 36.83 | 0.048 | 6M | 25.48 | 45    | 25.84 | 36.88 | 26.18 | 45    | 0.002 | 18M | 22.54 | 24.49 | 22.59 | 24.49 | 22.61 | 24.48 | 3.360 |
| 36 | Yes | Yes | No | Yes | 28.9  | 45    | 28.51 | 45    | 28.89 | 36.32 | 0.019 | 6M | 25.26 | 45    | 25.43 | 45    | 25.17 | 39.54 | 0.000 | 18M | 28.2  | 36.08 | 28.22 | 36.2  | 28.2  | 37.18 | 0.045 |
| 37 | No  | No  | No | No  | 27    | 38.87 | 27    | 37.89 | 27.29 | 36.45 | 0.009 | 6M | 26.67 | 45    | 26.95 | 36.8  | 26.58 | 45    | 0.004 | 12M | 25.91 | 45    | 25.67 | 45    | 25.86 | 45    | 0.000 |
| 38 | No  | No  | No | No  | 28.38 | 45    | 28.67 | 37.85 | 28.8  | 45    | 0.007 | 6M | 25.3  | 45    | 25.29 | 45    | 25.33 | 45    | 0.000 | 12M | 25.45 | 45    | 25.68 | 45    | 25.79 | 45    | 0.000 |
| 39 | No  | Yes | No | Yes | 30.45 | 45    | 30.44 | 45    | 30.47 | 45    | 0.001 | 6M | 27.09 | 45    | 27.26 | 45    | 27.4  | 45    | 0.000 | 12M | 23.97 | 45    | 23.98 | 37.87 | 23.95 | 36.88 | 0.001 |
| 40 | No  | No  | No | No  | 26.31 | 27.48 | 26.15 | 27.52 | 26.24 | 27.51 | 5.303 | 6M | 27.3  | 45    | 26.87 | 45    | 26.97 | 45    | 0.000 | 12M | 26.91 | 45    | 26.52 | 45    | 26.55 | 45    | 0.000 |
| 41 | No  | No  | No | No  | 27.5  | 45    | 27.58 | 35.65 | 27.53 | 36.56 | 0.021 | 6M | 24.84 | 45    | 25.01 | 45    | 24.79 | 45    | 0.000 | 15M | 26.13 | 37.26 | 25.78 | 45    | 26.07 | 36.85 | 0.004 |
| 42 | No  | No  | No | No  | 27.65 | 45    | 27.79 | 38.56 | 27.71 | 45    | 0.002 | 3M | 27.5  | 45    | 27.36 | 45    | 27.63 | 45    | 0.000 | 18M | 25.33 | 45    | 25.3  | 45    | 25.3  | 45    | 0.000 |
| 43 | No  | No  | No | No  | 28.68 | 45    | 28.99 | 45    | 28.88 | 45    | 0.000 | 3M | 23.61 | 36.77 | 23.52 | 37.99 | 23.62 | 37.23 | 0.001 | 15M | 27.18 | 45    | 26.85 | 45    | 26.87 | 45    | 0.000 |
| 44 | No  | Yes | No | Yes | 29.3  | 37.36 | 29.35 | 41.88 | 29.34 | 38.96 | 0.025 | 6M | 27.13 | 45    | 27.27 | 37.15 | 27.1  | 45    | 0.004 | 15M | 26.99 | 40.01 | 27.1  | 45    | 27.13 | 45    | 0.001 |
| 45 | No  | No  | No | No  | 26.54 | 31.57 | 26.72 | 31.75 | 26.87 | 31.78 | 0.396 | 9M | 26.35 | 45    | 26.66 | 36.99 | 26.52 | 45    | 0.003 | 15M | 26.76 | 33.71 | 26.83 | 34.29 | 26.88 | 33.03 | 0.113 |
| 46 | No  | No  | No | No  | 24.46 | 45    | 24.74 | 45    | 24.69 | 34.85 | 0.003 | 9M | 24.64 | 38.08 | 24.84 | 45    | 24.76 | 38.27 | 0.001 | 15M | 25.72 | 45    | 25.88 | 45    | 25.64 | 45    | 0.000 |
| 47 | No  | No  | No | No  | 28.32 | 33.17 | 28.58 | 33.5  | 28.47 | 34.08 | 0.385 | 3M | 27.28 | 45    | 27.54 | 45    | 27.34 | 45    | 0.000 | 12M | 22.58 | 36.21 | 22.63 | 28.92 | 22.63 | 37.5  | 0.052 |
| 48 | No  | No  | No | No  | 28.63 | 38.68 | 28.9  | 45    | 28.54 | 45    | 0.005 | 6M | 27.44 | 36.6  | 27.26 | 36    | 27.6  | 45    | 0.019 | 12M | 27.63 | 45    | 27.92 | 36.64 | 28.04 | 45    | 0.010 |
| 49 | No  | No  | No | No  | 27.74 | 45    | 27.53 | 45    | 27.79 | 45    | 0.000 | 3M | 24.99 | 45    | 25.37 | 32.22 | 25.25 | 37.21 | 0.036 | 15M | 27.31 | 45    | 27.4  | 45    | 27.29 | 45    | 0.000 |
| 50 | No  | No  | No | No  | 26.95 | 45    | 27.38 | 45    | 27.53 | 45    | 0.000 | 6M | 30.21 | 45    | 30.27 | 45    | 30.36 | 45    | 0.000 | 12M | 25.6  | 45    | 25.56 | 45    | 25.85 | 45    | 0.000 |
| 51 | No  | No  | No | No  | 27.24 | 36    | 27.23 | 34.84 | 27.22 | 34.27 | 0.058 | 6M | 26.41 | 45    | 26.24 | 39.46 | 26.44 | 45    | 0.000 | 12M | 26.79 | 45    | 26.7  | 45    | 26.86 | 45    | 0.000 |
| 52 | No  | No  | No | No  | 25.82 | 35.92 | 25.85 | 39.51 | 25.74 | 36.48 | 0.007 | 3M | 26.21 | 45    | 26.44 | 45    | 26.45 | 45    | 0.000 | 12M | 26.84 | 45    | 26.9  | 35.18 | 26.6  | 45    | 0.013 |
| 53 | No  | No  | No | No  | 27.52 | 38.51 | 27.56 | 37.28 | 27.31 | 45    | 0.007 | 6M | 22.69 | 45    | 22.64 | 40.6  | 22.75 | 45    | 0.000 | 12M | 25.19 | 45    | 25.2  | 45    | 25.23 | 45    | 0.000 |
| 54 | Yes | Yes | No | Yes | 25.89 | 35.24 | 25.97 | 35.41 | 25.92 | 35.3  | 0.019 | 1M | 25.35 | 45    | 25.45 | 45    | 25.34 | 45    | 0.000 | 16M | 26.45 | 45    | 26.59 | 45    | 26.4  | 45    | 0.000 |
| 55 | No  | No  | No | No  | 27.63 | 45    | 27.69 | 45    | 27.73 | 45    | 0.000 | 9M | 25.71 | 45    | 25.4  | 45    | 25.91 | 45    | 0.000 | 15M | 28.01 | 45    | 28.82 | 36.96 | 28.39 | 45    | 0.014 |
| 56 | No  | No  | No | No  | 27.34 | 45    | 27.15 | 45    | 26.95 | 45    | 0.000 | 6M | 23.99 | 45    | 23.98 | 37.22 | 24.06 | 45    | 0.000 | 12M | 27.08 | 36.92 | 27.14 | 45    | 27.15 | 45    | 0.006 |
| 57 | No  | No  | No | No  | 25.34 | 30.45 | 25.1  | 30.64 | 24.97 | 30.3  | 0.323 | 6M | 27.15 | 45    | 27.48 | 35.93 | 27.52 | 45    | 0.012 | 12M | 24.84 | 45    | 24.9  | 45    | 24.97 | 45    | 0.000 |
| 58 | No  | No  | No | No  | 26.57 | 32.4  | 26.75 | 31.09 | 26.63 | 31.83 | 0.383 | 3M | 25.88 | 45    | 25.9  | 45    | 25.89 | 45    | 0.000 | 9M  | 26.12 | 45    | 26.38 | 45    | 26.27 | 36.87 | 0.002 |
| 59 | No  | No  | No | No  | 25.44 | 39.17 | 25.28 | 33.92 | 25.49 | 33.91 | 0.020 | 6M | 27.89 | 45    | 27.8  | 45    | 27.83 | 37.03 | 0.006 | 18M | 25.87 | 45    | 26.13 | 45    | 25.75 | 45    | 0.000 |
| 60 | Yes | No  | No | Yes | 26.85 | 45    | 26.58 | 45    | 26.73 | 45    | 0.000 | 3M | 28.47 | 45    | 28.19 | 45    | 28.37 | 45    | 0.000 | 9M  | 27.44 | 45    | 27.9  | 45    | 27.85 | 45    | 0.000 |
| 61 | No  | No  | No | No  | 27.48 | 45    | 27.33 | 42.44 | 27.37 | 45    | 0.000 | 6M | 29.76 | 36.93 | 30.19 | 45    | 29.94 | 45    | 0.037 | 9M  | 23.42 | 45    | 23.56 | 36.78 | 23.69 | 45    | 0.000 |

# These 61 colorectal cancer patients were detected SEPT9 methylation completely before operation and 2 times after operation.

\* Poor prognosis refers to any of the three bad prognostic factors, including recurrence, new metastases and death.

## CT criteria for ACTIN and SEPT9 were separately less than or equal to 32.1 and less than 45, the opposite value would show 'Undetermined', here all value of 45 represented undetermined SEPT9 CT value for calculating methylation level. Totally 61 patients had complete pre-operation and 2 time points follow-up samples, all these samples had calculated methylation levels.

\*\* ACTIN was used as reference, the results of SEPT9 methylation level was calculated using method similar to the  $2^{(-\Delta\Delta CT)}$  with normalization to ACTIN.

**Supplementary Table S2.** Carcinoembryonic antigen of colorectal cancer patients at different time points before and after surgery

| No. | Recurrence | New Metastases | Death | Poor Prognosis * | CEA Pre-Operation | CEA (ng/ml) Post-operation |     |     |     |     |     |     |     |     |     |
|-----|------------|----------------|-------|------------------|-------------------|----------------------------|-----|-----|-----|-----|-----|-----|-----|-----|-----|
|     |            |                |       |                  |                   | 1W                         | 1M  | 3M  | 6M  | 9M  | 12M | 15M | 18M | 21M | 24M |
| 1   | No         | No             | No    | No               | 2                 | 1.3                        | 1.9 | 2.7 |     |     | 1.8 |     | 2   |     |     |
| 2   | No         | Yes            | No    | Yes              | 4.2               |                            | 3.8 | 12  |     |     |     |     | 39  |     | 66  |
| 3   | No         | No             | No    | No               | 2                 |                            | 0.6 |     | 0.9 | 0.6 | 0.7 | 0.9 |     | 2.4 |     |
| 4   | No         | No             | No    | No               | 4.6               | 0.8                        | 0.7 | 0.9 | 1.1 |     |     |     |     |     |     |
| 5   | No         | No             | No    | No               | 0.8               | 1.2                        |     | 3   | 2.1 | 1.8 |     | 1.8 | 1.8 |     | 1.6 |
| 6   | No         | No             | No    | No               | 3                 |                            |     | 3.6 | 3.5 | 2.3 |     | 2.1 | 2.3 | 3.2 |     |
| 7   | No         | No             | No    | No               | 9.9               | 4.9                        |     | 1.7 | 1.7 | 1.7 |     | 1.6 | 1.9 | 2.2 |     |
| 8   | No         | No             | Yes   | Yes              | 4.5               | 5.5                        |     | 8.8 | 9.3 |     |     |     |     |     |     |
| 9   | No         | No             | No    | No               | 1.7               |                            | 1.4 | 2   | 1.6 | 1.3 | 2.2 | 1.7 |     |     |     |
| 10  | No         | No             | No    | No               | 6.4               |                            | 2.4 | 4.4 | 4.8 | 3.1 | 3.2 | 3.1 | 3.7 |     | 4.8 |
| 11  | No         | No             | No    | No               | 1.4               |                            | 0.7 | 1.3 | 1.2 |     | 1.4 |     |     | 1.2 |     |
| 12  | No         | No             | No    | No               | 1.6               | 1.5                        |     | 1.2 | 1.4 | 1.9 | 1.2 |     |     |     |     |
| 13  | No         | No             | No    | No               | 1.1               | 0.5                        |     |     | 2   |     |     |     | 0.7 |     |     |
| 14  | No         | No             | No    | No               | 1.5               | 2                          | 2   | 2.5 | 2.3 | 2.6 | 2.5 |     | 2.9 | 2.6 |     |
| 15  | No         | No             | Yes   | Yes              | 58                |                            |     | 12  |     |     |     |     |     |     |     |
| 16  | No         | No             | No    | No               | 2.2               | 1.7                        |     | 2.2 | 2.5 | 2.4 | 1.8 |     | 2.7 | 2.8 |     |
| 17  | No         | No             | No    | No               | 7.3               |                            | 1.8 | 1.8 | 1.8 | 2.5 |     | 2.4 |     |     | 2.6 |
| 18  | No         | No             | No    | No               | 1                 | 0.8                        | 1.2 | 1.5 |     |     | 1.1 | 1.2 | 1.2 | 1.1 | 1.1 |
| 19  | No         | No             | No    | No               | 1.7               | 1.1                        |     | 2   |     | 2.3 |     |     | 2.1 | 2   |     |
| 20  | No         | No             | No    | No               | 3.4               | 2.3                        |     | 3.9 | 3.6 |     |     |     | 3.1 |     | 3.1 |
| 21  | No         | No             | No    | No               | 0.9               |                            | 1.2 | 2   | 1.9 | 1.6 | 1.8 | 1.6 |     |     |     |
| 22  | No         | No             | No    | No               | 3.9               |                            | 1.5 | 1.4 | 1.1 | 0.9 | 1   |     |     | 0.7 |     |
| 23  | No         | No             | No    | No               | 1.3               | 1.2                        | 1.4 | 1.3 | 1.5 | 1.5 |     |     |     | 1.4 | 2   |
| 24  | No         | No             | No    | No               | 2.4               |                            | 2   | 2.6 | 2.8 | 2.3 | 1.9 | 2.5 |     |     |     |
| 25  | No         | No             | No    | No               | 7.7               | 2.7                        | 2.9 | 3.2 | 2.9 | 2.1 | 3.2 | 3.9 | 2.9 | 3.2 |     |
| 26  | No         | No             | No    | No               | 0.8               | 0.8                        |     | 0.7 | 0.9 | 0.6 | 1.2 | 1.3 |     |     | 0.7 |
| 27  | No         | No             | No    | No               | 2.2               | 1.2                        | 1.3 |     | 1.7 | 1.6 | 1.7 |     |     | 1.7 |     |
| 28  | No         | Yes            | No    | Yes              | 1.3               |                            | 0.7 |     |     | 1.1 |     |     |     | 1.6 | 4.2 |
| 29  | No         | No             | No    | No               | 2.1               | 1.4                        |     |     | 2.9 | 1.6 | 1.9 |     | 3   |     | 2   |
| 30  | No         | No             | No    | No               | 2.4               | 1.6                        |     | 2.2 |     |     | 3.5 |     |     |     | 2.8 |
| 31  | Yes        | No             | No    | Yes              | 2.2               | 2.1                        | 1.3 |     | 2   | 2.3 |     |     | 4.4 |     |     |
| 32  | No         | No             | No    | No               | 3.1               |                            | 2.5 |     | 3.5 | 3.7 | 3   | 2.6 | 2.9 |     |     |
| 33  | No         | No             | No    | No               | 6.2               | 4.1                        | 4.2 | 6.5 | 4.6 | 3.4 | 5   | 5.4 | 5.3 | 6.9 | 6.2 |
| 34  | No         | No             | No    | No               | 2.2               | 1.1                        |     | 2.2 | 2.5 |     |     |     |     | 1.4 | 1.8 |

|    |     |     |     |     |     |     |     |     |     |     |     |     |     |     |
|----|-----|-----|-----|-----|-----|-----|-----|-----|-----|-----|-----|-----|-----|-----|
| 35 | Yes | Yes | Yes | Yes | 19  | 7   | 6.2 |     | 9.7 | 7.9 |     | 5.3 |     |     |
| 36 | No  | No  | No  | No  | 12  | 2.3 |     | 1.6 |     | 1.7 |     | 1.4 | 2   | 1.6 |
| 37 | No  | No  | No  | No  | 3.2 |     | 4.6 | 6.2 | 7.1 |     |     |     | 7.6 | 7.5 |
| 38 | No  | No  | No  | No  | 2.2 |     | 1.1 | 1.3 | 1.2 | 1.8 | 1.7 |     |     |     |
| 39 | Yes | Yes | Yes | Yes | 36  | 7.6 |     | 116 |     |     |     |     |     |     |
| 40 | No  | No  | No  | No  | 6.1 |     |     | 4.5 | 4.4 |     | 6.4 |     | 4.9 | 4.9 |
| 41 | No  | No  | No  | No  | 5.4 | 2.4 |     | 1.4 | 2   | 2.1 |     | 2.6 | 2.7 | 3   |
| 42 | No  | No  | No  | No  | 20  | 6.8 | 1.8 | 1.3 | 1.8 |     |     | 1.4 |     | 1.7 |
| 43 | No  | Yes | No  | Yes | 5.1 |     | 1.1 | 1.3 | 0.9 | 1   |     |     |     |     |
| 44 | No  | Yes | Yes | Yes | 9.2 | 1.3 |     | 1.8 | 1.3 |     |     |     |     |     |
| 45 | No  | No  | No  | No  | 4.4 |     | 2.6 |     | 2.8 |     | 2.6 |     |     |     |
| 46 | No  | No  | No  | No  | 7.4 | 5.8 |     | 6.1 | 4.9 |     | 4.4 | 5.3 |     | 3.5 |
| 47 | No  | No  | No  | No  | 2.4 | 1.6 |     | 2.6 | 2.5 | 2.7 | 2.2 |     |     | 2.5 |
| 48 | No  | No  | No  | No  | 2.2 | 0.8 |     | 1   | 1   |     |     | 1.4 |     |     |
| 49 | No  | No  | No  | No  | 2.5 |     |     | 2.4 |     |     | 2.2 |     | 2.1 |     |
| 50 | No  | No  | No  | No  | 1   |     |     | 1.1 | 1.1 |     |     | 0.9 |     |     |
| 51 | No  | Yes | Yes | Yes | 4   |     | 3.3 | 2.9 |     |     |     | 8.3 |     |     |
| 52 | No  | No  | Yes | Yes | 6.8 |     | 3.4 | 6   | 27  | 40  |     |     |     |     |
| 53 | No  | No  | No  | No  | 3.8 | 1.7 |     |     |     |     | 2.4 |     | 2.7 |     |
| 54 | No  | No  | No  | No  | 1.6 |     |     |     |     |     |     |     | 1.5 |     |
| 55 | No  | No  | No  | No  | 1   | 0.7 | 0.7 | 0.7 |     |     | 1   | 1   |     | 1.3 |
| 56 | No  | No  | No  | No  | 6.1 | 1.5 | 0.9 | 2.2 | 1.6 | 1.1 |     |     | 1.1 | 1.6 |
| 57 | No  | Yes | No  | Yes | 10  |     | 12  |     |     | 17  | 4.3 |     | 4.1 | 30  |
| 58 | No  | No  | No  | No  | 2.2 |     |     |     | 1   |     | 1   |     | 1.1 |     |
| 59 | No  | No  | No  | No  | 4.5 | 4.2 |     | 4.4 |     | 5.3 | 6   |     | 4.7 | 5.3 |
| 60 | Yes | Yes | No  | Yes | 8.8 |     | 2.1 | 17  | 2   |     | 3.1 |     | 143 |     |
| 61 | Yes | Yes | No  | Yes | 2.9 | 4.3 |     |     | 2.8 | 2.9 |     |     |     |     |
| 62 | No  | No  | No  | No  | 1.5 |     | 1.4 | 1.9 | 2.4 | 2.2 | 2   |     |     |     |
| 63 | No  | Yes | No  | Yes | 6.4 |     | 2.4 |     | 9.5 |     | 4.7 |     |     |     |
| 64 | No  | No  | No  | No  | 4.1 |     | 4.8 |     | 1.9 | 2.1 | 3   |     | 2.1 |     |
| 65 | No  | No  | No  | No  | 6   |     | 7.1 |     | 3   | 3   |     | 7.6 | 9.2 |     |
| 66 | No  | No  | No  | No  | 29  |     | 6.7 | 6.4 | 9.5 | 11  |     |     |     | 5.2 |
| 67 | No  | No  | No  | No  | 1.1 | 1   |     | 2.3 |     | 2   | 1.2 | 1.5 | 1.6 |     |
| 68 | No  | Yes | No  | Yes | 1.7 |     | 2.5 | 2.2 | 2.5 | 3.5 |     | 3.1 |     |     |
| 69 | No  | Yes | No  | Yes | 2.5 |     | 0.9 |     | 1.5 |     |     | 1.5 |     |     |
| 70 | No  | No  | No  |     | 36  |     |     |     |     | 4.5 |     | 5.1 | 6.5 |     |
| 71 | Yes | No  | No  | Yes | 0.9 |     | 0.7 | 0.8 |     | 1.4 |     |     |     |     |
| 72 | No  | No  | No  |     | 2.2 |     | 0.9 |     |     | 0.9 | 1.5 | 1.3 |     | 1.7 |

|    |     |     |     |     |     |     |     |     |     |     |     |     |     |
|----|-----|-----|-----|-----|-----|-----|-----|-----|-----|-----|-----|-----|-----|
| 73 | No  | No  | Yes | Yes | 1.8 |     |     |     |     |     |     |     |     |
| 74 | No  | No  | No  | No  | 2.7 | 2   |     | 2.5 |     | 2.4 | 2.9 |     | 1.3 |
| 75 | No  | No  | No  | No  | 14  |     | 3.5 |     | 2.6 | 2.6 | 2.7 |     |     |
| 76 | No  | No  | No  | No  | 3.3 | 2.8 |     |     |     |     | 4   |     | 5.2 |
| 77 | No  | No  | No  | No  | 5.7 | 1.9 |     |     | 2.7 |     | 3   | 4.5 | 4.6 |
| 78 | No  | No  | No  | No  | 4.3 |     | 2.3 | 3.1 | 3.8 | 3.6 | 5.4 |     | 1.8 |
| 79 | No  | No  | No  | No  | 2.7 |     | 1.2 | 2.2 |     |     | 2.3 |     |     |
| 80 | No  | No  | No  | No  | 1.8 |     | 0.9 |     | 1.5 | 1.6 | 1.2 |     | 1.3 |
| 81 | Yes | Yes | No  | Yes | 6.7 |     | 1.2 |     |     |     |     |     |     |
| 82 | No  | No  | No  | No  | 2.2 |     |     |     |     | 1.5 |     | 1.7 | 25  |
| 83 | No  | No  | No  | No  | 24  |     |     |     | 6.2 |     | 6.2 |     | 2.2 |
| 84 | No  | No  | No  | No  | 2.9 |     |     |     | 1.4 | 1.2 | 1.5 |     | 1.2 |
| 85 | No  | No  | No  | No  | 0.7 |     | 7.8 | 10  |     | 8.9 |     |     |     |
| 86 | No  | No  | No  | No  | 3.2 |     |     | 1.1 | 1.2 |     | 1.2 |     | 1.1 |
| 87 | Yes | No  | No  | Yes | 84  |     |     | 15  | 84  |     |     |     |     |
| 88 | No  | No  | No  | No  | 1   | 0.7 |     | 0.8 | 0.9 | 0.9 | 1.1 |     |     |
| 89 | No  | No  | Yes | Yes | 4   |     |     |     | 3.6 |     |     |     |     |

\* Poor prognosis refers to any of the three bad prognostic factors, including recurrence, new metastases and death.
